# Supplementary material for: Reverse Pathway Genetic Approach Identifies Epistasis in Autism Spectrum Disorders
Source: PubMed Central journal article supplement (PMC5226683; doi:10.1371/journal.pgen.1006516), 2017-01-11
Supplement: pgen.1006516.s001.pdf [file pgen.1006516.s001.pdf]

**Table S1: Ras/MAPK SNP set.** The genes associated with the Ras/MAPK pathway that were used in the analysis are listed in the table. For each gene, the table lists the following in order of columns: HUGO gene name, associated RASopathy disorder or pathway role, chromosome, position (reference version hg19), region length with +/-5 kb flanking the gene, and total number of SNPs overlapping with the ASD dataset. CFC: cardiofaciocutaneous syndrome; NS: Noonan syndrome; CS: Costello syndrome; NF1: neurofibromatosis type 1; CM-AVM: Capillary malformation-arteriovenous malformation syndrome; effector – protein carrying out cellular signal transduction.

| <b>gene</b>   | <b>RASopathy</b> | <b>chromosome</b> | <b>position</b>         | <b>length (bp)</b> | <b>total SNPs</b> |
|---------------|------------------|-------------------|-------------------------|--------------------|-------------------|
| <i>BRAF</i>   | CFC, NS          | 7                 | 140,433,813-140,624,564 | 200,751            | 267               |
| <i>CBL</i>    | NS               | 11                | 119,076,986-119,178,859 | 111,873            | 74                |
| <i>HRAS</i>   | CS               | 11                | 532,242-535,550         | 13,308             | 0                 |
| <i>KRAS</i>   | CFC, NS          | 12                | 25,358,180-25,403,854   | 55,674             | 139               |
| <i>LZTR1</i>  | NS               | 22                | 21,336,558-21,353,326   | 26,768             | 1                 |
| <i>MAP2K1</i> | CFC, NS          | 15                | 66,679,211-66,783,882   | 114,671            | 276               |
| <i>MAP2K2</i> | CFC              | 19                | 4,090,320-4,124,126     | 43,806             | 0                 |
| <i>MAPK1</i>  | [effector]       | 22                | 22,113,947-22,221,970   | 118,023            | 218               |
| <i>MAPK3</i>  | [effector]       | 16                | 30,125,426-30,134,630   | 19,204             | 0                 |
| <i>NF1</i>    | NF1              | 17                | 29,421,945-29,704,695   | 292,750            | 249               |
| <i>NRAS</i>   | NS               | 1                 | 115,247,085-115,259,515 | 22,430             | 22                |
| <i>PTPN11</i> | NS               | 12                | 112,856,536-112,947,717 | 101,181            | 21                |
| <i>RAF1</i>   | NS               | 3                 | 12,625,100-12,705,700   | 90,600             | 187               |
| <i>RASA1</i>  | CM-AVM           | 5                 | 86,564,070-86,687,743   | 133,673            | 65                |
| <i>RASA2</i>  | NS               | 3                 | 141,205,926-141,331,197 | 135,271            | 86                |
| <i>RIT1</i>   | NS               | 1                 | 155,867,599-155,880,706 | 23,107             | 28                |

|               |                      |    |                             |         |     |
|---------------|----------------------|----|-----------------------------|---------|-----|
| <i>SHOC2</i>  | NS                   | 10 | 112,679,301-<br>112,773,425 | 104,124 | 164 |
| <i>SOS1</i>   | NS                   | 2  | 39,208,690-<br>39,347,604   | 148,914 | 176 |
| <i>SOS2</i>   | NS                   | 14 | 50,583,846-<br>50,698,099   | 124,253 | 240 |
| <i>SPRED1</i> | NF1-like<br>syndrome | 15 | 38545,052-<br>38,649,450    | 114,398 | 307 |

---
