# Supplementary material for: Reverse Pathway Genetic Approach Identifies Epistasis in Autism Spectrum Disorders
Source: PubMed Central journal article supplement (PMC5226683; doi:10.1371/journal.pgen.1006516), 2017-01-11
Supplement: pgen.1006516.s002.pdf [file pgen.1006516.s002.pdf]

**Table S2. Calculation of multiple testing thresholds.** The Ras/MAPK SNP set is shown, including gene, chromosome positions, total SNPs, LD-independent SNPs, and proportion of the genome screened for epistasis (subtracting the X chromosome and gene chromosome proportion from approximate 3 billion bp genome). The last row indicates the threshold calculated by multiplying  $5 \times 10^{-8}$  by the gene or screening proportion x LD-independent SNPs proportion total for gene-based and genome-wide independent thresholds, respectively.

| <b>gene</b>     | <b>CHR</b> | <b>START</b> | <b>END</b> | <b>N total SNPs</b> | <b>N SNPs (<math>R^2 &lt; 0.2</math>)</b> | <b>screening proportion (%)</b> |
|-----------------|------------|--------------|------------|---------------------|-------------------------------------------|---------------------------------|
| <i>BRAF</i>     | 7          | 140428813    | 140629564  | 267                 | 4                                         | 89.5                            |
| <i>CBL</i>      | 11         | 119071986    | 119183859  | 74                  | 2                                         | 90.3                            |
| <i>KRAS</i>     | 12         | 25353180     | 25408854   | 139                 | 8                                         | 90.4                            |
| <i>LZTR1</i>    | 22         | 21331558     | 21358326   | 1                   | 1                                         | 93.1                            |
| <i>MAP2K1</i>   | 15         | 66674211     | 66788882   | 276                 | 8                                         | 91.4                            |
| <i>MAPK1</i>    | 22         | 22108947     | 22226970   | 218                 | 5                                         | 93.1                            |
| <i>NF1</i>      | 17         | 29416945     | 29709695   | 249                 | 4                                         | 92                              |
| <i>NRAS</i>     | 1          | 115242085    | 115264515  | 22                  | 4                                         | 86.5                            |
| <i>PTPN11</i>   | 12         | 112851536    | 112952717  | 21                  | 4                                         | 90.4                            |
| <i>RAF1</i>     | 3          | 12620100     | 12710700   | 187                 | 4                                         | 88.2                            |
| <i>RASA1</i>    | 5          | 86559070     | 86692743   | 65                  | 6                                         | 88.8                            |
| <i>RASA2</i>    | 3          | 141200926    | 141336197  | 86                  | 4                                         | 88.2                            |
| <i>RIT1</i>     | 1          | 155862599    | 155885706  | 28                  | 2                                         | 86.5                            |
| <i>SHOC2</i>    | 10         | 112674301    | 112778425  | 164                 | 5                                         | 90.3                            |
| <i>SOS1</i>     | 2          | 39203690     | 39352604   | 176                 | 3                                         | 86.7                            |
| <i>SOS2</i>     | 14         | 50578846     | 50703099   | 240                 | 4                                         | 91.2                            |
| <i>SPRED1</i>   | 15         | 38540052     | 38654450   | 307                 | 5                                         | 91.4                            |
| <b>17 genes</b> |            |              |            | <b>2520 SNPs</b>    | <b>73 ind.</b>                            | <b>65.72 ind x prop</b>         |
|                 |            |              |            |                     |                                           | $2.9 \times 10^{-9}$            |
|                 |            |              |            |                     |                                           | $7.6 \times 10^{-10}$           |

Abbreviations: CHR chromosome; START start position (bp); END end position (bp)
