# Supplementary material for: Reverse Pathway Genetic Approach Identifies Epistasis in Autism Spectrum Disorders
Source: PubMed Central journal article supplement (PMC5226683; doi:10.1371/journal.pgen.1006516), 2017-01-11
Supplement: pgen.1006516.s003.pdf [file pgen.1006516.s003.pdf]

**Table S3. Epistasis data for top SNPs.** For each of the top epistasis results in Table 1, we show the epistasis data here. The SNP rsIDs are shown with the Ras/MAPK (RMK) SNP first and epistatic (EPI) SNP second. Genotype abbreviations are: HOM – homozygous for major allele; hom – homozygous for minor allele; Het – heterozygous. The observed counts for each genotype-combination are shown in the same order as SNPs (e.g. HOM-Het represents RMK SNP homozygous for the major allele and EPI SNP heterozygous), with expected counts and pseudo-control counts (respectively) displayed in brackets. Cells with count of more than 5 observed or expected are **bolded** if at least 2X excess is observed in cases compared with expectation and are shown in *italics* if at least 0.5X decrease is observed in cases compared with expectation. Asterisks are used to show pseudo-control counts deviating 2-fold from expectation in either direction.

| RMK-EPI SNPs                        | HOM-HOM             | HOM-Het                 | Het-HOM               | Het-Het              | HOM-hom            | hom-HOM       | Het-hom            | hom-Het            | hom-hom    |
|-------------------------------------|---------------------|-------------------------|-----------------------|----------------------|--------------------|---------------|--------------------|--------------------|------------|
| rs713365-<br>rs57173428             | 3830<br>[3815/3820] | 93<br>[105/118]         | 126<br>[141/124]      | <b>14</b><br>[4/3]   | 1<br>[1/1]         | 2<br>[1/1]    | 1<br>[0/0]         | 0<br>[0/0]         | 0<br>[0/0] |
| rs7133635-<br>rs17110869            | 3817<br>[3805/3807] | 92<br>[104/120]         | 128<br>[140/123]      | <b>14</b><br>[4/3]   | 1<br>[1/1]         | 2<br>[1/1]    | 1<br>[0/0]         | 0<br>[0/0]         | 0<br>[0/0] |
| rs11913063-<br>rs28459694           | 3377<br>[3361/3352] | 78<br>[97/107]          | 307<br>[315/314]      | <b>23</b><br>[9/9]   | 4<br>[1/1]         | 0<br>[7/7]    | 1<br>[0/0]         | 1<br>[0/1]         | 0<br>[0/0] |
| rs62487902-<br>rs72690923           | 3042<br>[3004/2965] | 185<br>[212/216]        | 453<br>[490/536]      | <b>61</b><br>[34/28] | <b>19</b><br>[4/3] | 1<br>[20/15]  | 1<br>[1/2]         | 4<br>[1/1]         | 0<br>[0/0] |
| rs1733826-<br>rs12239450            | 2792<br>[2756/2762] | 354<br>[387/359]        | 263<br>[295/313]      | <b>72</b><br>[41/47] | 11<br>[14/14]      | 7<br>[8/9]    | 3<br>[1/0]         | 2<br>[1/0]         | 0<br>[0/0] |
| rs73398437-<br>rs62168052           | 3292<br>[3269/3251] | 154<br>[179/178]        | 170<br>[189/206]      | <b>30</b><br>[10/13] | 5<br>[2/1]         | 2<br>[3/4]    | 0<br>[0/0]         | 0<br>[0/0]         | 0<br>[0/0] |
| chr7:14062570<br>7:l-rs1318299      | 3248<br>[3237/3230] | 65<br>[79/78]           | 381<br>[392/405]      | <b>26</b><br>[10/7]  | 0<br>[0/0]         | 10<br>[12/10] | 0<br>[0/0]         | 1<br>[0/1]         | 0<br>[0/0] |
| rs74644204-<br>rs149565205          | 3448<br>[3438/3462] | 83<br>[93/66]           | 160<br>[173/168]      | <b>17</b><br>[5/6]   | 0<br>[1/2]         | 2<br>[2/7*]   | 0<br>[0/0]         | 1<br>[0/0]         | 0<br>[0/0] |
| rs7714386-<br>rs56667163            | 3509<br>[3490/3507] | 413<br>[423/417]        | 103<br>[130/124]      | <b>37</b><br>[16/11] | 6<br>[13/13]       | 3<br>[1/0]    | 2<br>[0/1]         | 0<br>[0/0]         | 0<br>[0/0] |
| rs17879775-<br>rs11925140           | 3524<br>[3607/3514] | 115<br>[129/142]        | <b>183</b><br>[95/75] | <b>14</b><br>[3/3]   | 0<br>[1/2]         | 0<br>[1/0]    | 0<br>[0/0]         | 0<br>[0/0]         | 0<br>[0/0] |
| chr2:39208512<br>:l-rs304654        | 3326<br>[3302/3317] | 73<br>[92/90]           | 448<br>[474/465]      | <b>31</b><br>[13/10] | 0<br>[1/18*]       | 19<br>[17/1*] | 1<br>[0/0]         | 2<br>[0/0]         | 0<br>[0/0] |
| chr15:3859189<br>3:D-<br>rs73760016 | 3432<br>[3407/3422] | 200<br>[225/222]        | 189<br>[206/191]      | <b>33</b><br>[14/15] | 2<br>[4/3]         | 2<br>[3/4]    | 1<br>[0/1]         | 0<br>[0/1]         | 0<br>[0/0] |
| rs117147554-<br>rs80214471          | 3289<br>[3277/3263] | 129<br>[143/164]        | 152<br>[163/158]      | <b>20</b><br>[7/6]   | 3<br>[2/0]         | 0<br>[2/4]    | 1<br>[0/0]         | 1<br>[0/0]         | 0<br>[0/0] |
| rs75961317-<br>rs143823697          | 3291<br>[3271/3293] | 185<br>[203/207]        | 219<br>[241/220]      | <b>34</b><br>[15/14] | 4<br>[3/2]         | 3<br>[4/2]    | 0<br>[0/0]         | 2<br>[0/0]         | 0<br>[0/0] |
| rs75087565-<br>rs254700             | 3412<br>[3399/3399] | 73<br>[84/75]           | 172<br>[189/200]      | <b>17</b><br>[5/3]   | 1<br>[1/0]         | 5<br>[3/3]    | 0<br>[0/0]         | 0<br>[0/0]         | 0<br>[0/0] |
| rs58347743-<br>rs80179511           | 2426<br>[2382/2414] | 310<br>[345/352]        | 660<br>[694/658]      | 135<br>[101/103]     | 5<br>[12/9]        | 36<br>[51/46] | 7<br>[4/5]         | <b>15</b><br>[7/9] | 2<br>[0/0] |
| rs41280637-<br>rs114617777          | 3248<br>[3227/3247] | 369<br>[389/384]        | 148<br>[171/150]      | <b>43</b><br>[21/23] | 8<br>[12/15]       | 3<br>[2/3]    | 2<br>[1/0]         | 1<br>[0/0]         | 0<br>[0/0] |
| rs11818771-<br>chr6:80625529<br>:D  | 2679<br>[2638/2615] | 668<br>[699/716]        | 214<br>[257/263]      | 95<br>[68/69]        | 42<br>[46/48]      | 6<br>[6/5]    | <b>12</b><br>[5/4] | 5<br>[2/1]         | 0<br>[0/0] |
| rs9672789-<br>rs113552799           | 2709<br>[2678/2667] | 219<br>[255/239]        | 453<br>[477/498]      | 69<br>[45/44]        | 5<br>[6/5]         | 19<br>[21/29] | 4<br>[1/1]         | <b>7</b><br>[2/2]  | 0<br>[0/0] |
| rs12309312-<br>rs118078508          | 3508<br>[3498/3477] | 164<br>[176/176]        | 77<br>[86/109]        | <b>16</b><br>[4/2]   | 2<br>[2/2]         | 0<br>[1/0]    | 0<br>[0/1]         | 0<br>[0/0]         | 0<br>[0/0] |
| rs3093853-<br>rs114490548           | 3530<br>[3505/3466] | 142<br>[168/177]        | 169<br>[190/218]      | <b>26</b><br>[9/11]  | 4<br>[2/1]         | 4<br>[3/3]    | 0<br>[0/0]         | 1<br>[0/0]         | 0<br>[0/0] |
| rs114670618-<br>rs2043732           | 3184<br>[3162/3179] | 279<br>[305/273]        | 165<br>[184/195]      | <b>38</b><br>[18/20] | 10<br>[7/5]        | 1<br>[3/6*]   | 2<br>[0/0]         | 1<br>[0/1]         | 0<br>[0/0] |
| rs117672593-<br>rs73688732          | 3347<br>[3333/3340] | 128<br>[142/133]        | 213<br>[229/235]      | <b>26</b><br>[10/9]  | 0<br>[2/1]         | 4<br>[4/1]    | 1<br>[0/0]         | 0<br>[0/0]         | 0<br>[0/0] |
| rs6948377-<br>rs1826547             | 3158<br>[3137/3138] | <b>334</b><br>[120/136] | 99<br>[352/335]       | <b>29</b><br>[13/13] | 1<br>[1/2]         | 9<br>[10/9]   | 2<br>[0/0]         | 2<br>[0/1]         | 0<br>[0/0] |
| rs116702532-<br>rs41274082          | 3548<br>[3534/3521] | 180<br>[194/186]        | 119<br>[135/155]      | <b>24</b><br>[7/6]   | 2<br>[3/4]         | 2<br>[1/3]    | 0<br>[0/0]         | 0<br>[0/0]         | 0<br>[0/0] |
| rs61761074-<br>rs140695911          | 3256<br>[3243/3245] | 170<br>[183/82]         | 156<br>[170/170]      | <b>25</b><br>[10/10] | 1<br>[3/3]         | 1<br>[2/1]    | 2<br>[0/0]         | 0<br>[0/0]         | 0<br>[0/0] |

|               |             |           |           |                |         |         |              |              |       |
|---------------|-------------|-----------|-----------|----------------|---------|---------|--------------|--------------|-------|
| rs75217189-   | 3372        | 262       | 150       | <b>33</b>      | 4       | 1       | 1            | 1            | 0     |
| rs192196641   | [3358/3332] | [281/317] | [163/144] | <b>[14/18]</b> | [6/10]  | [2/2]   | [0/1]        | [0/0]        | [0/0] |
| rs75756950-   | 2824        | 451       | 285       | 91             | 15      | 14      | 5            | <b>5</b>     | 0     |
| rs2765709     | [2779/2786] | [483/456] | [335/340] | <b>[58/66]</b> | [21/24] | [10/15] | [3/2]        | <b>[2/1]</b> | [0/0] |
| rs75217189-   | 3358        | 231       | 149       | <b>29</b>      | 2       | 1       | 1            | 1            | 0     |
| rs11255742    | [3345/3319] | [246/281] | [163/145] | <b>[12/17]</b> | [5/8]   | [2/2]   | [0/0]        | [0/0]        | [0/0] |
| rs72417307-   | 3339        | 380       | 223       | 58             | 18      | 4       | <b>6</b>     | 1            | 0     |
| rs2441690     | [3302/3273] | [423/404] | [252/285] | <b>[32/44]</b> | [14/17] | [5/5]   | <b>[1/1]</b> | [1/0]        | [0/0] |
| rs2123876-    | 2961        | 529       | 374       | 123            | 28      | 13      | 6            | <b>7</b>     | 0     |
| chr12:2162469 | [2914/2922] | [575/569] | [419/419] | <b>[83/80]</b> | [28/29] | [15/18] | [4/2]        | <b>[3/1]</b> | [0/1] |
| 4:D           |             |           |           |                |         |         |              |              |       |
| rs117834974-  | 3612        | 163       | 119       | <b>21</b>      | 2       | 2       | 0            | 0            | 0     |
| rs12582581    | [3600/3610] | [132/124] | [177/178] | <b>[6/4]</b>   | [1/1]   | [2/1]   | [0/1]        | [0/0]        | [0/0] |
| rs17879775-   | 3385        | 130       | 80        | <b>14</b>      | 1       | 0       | 1            | 0            | 0     |
| rs78762238    | [3374/3404] | [142/128] | [89/73]   | <b>[4/5]</b>   | [1/1]   | [1/0]   | [0/0]        | [0/0]        | [0/0] |
| rs1357384-    | 3594        | 94        | 144       | <b>17</b>      | 1       | 2       | 0            | 0            | 0     |
| chr13:7870040 | [3582/3579] | [106/112] | [156/157] | <b>[5/3]</b>   | [1/0]   | [2/1]   | [0/0]        | [0/0]        | [0/0] |
| 8:D           |             |           |           |                |         |         |              |              |       |
| rs75087565-   | 3050        | 417       | 138       | <b>49</b>      | 16      | 4       | 2            | 1            | 0     |
| rs73475884    | [3017/3067] | [447/393] | [168/175] | <b>[25/27]</b> | [17/12] | [2/3]   | [1/0]        | [0/0]        | [0/0] |
| rs75087565-   | 3047        | 419       | 139       | <b>49</b>      | 16      | 4       | 2            | 1            | 0     |
| rs55942942    | [3015/3065] | [449/393] | [167/176] | <b>[25/27]</b> | [17/12] | [2/3]   | [1/0]        | [0/0]        | [0/0] |
| rs13083303-   | 2895        | 95        | 842       | <b>71</b>      | 0       | 63      | 0            | 5            | 0     |
| chr15:7169718 | [2866/2862] | [126/104] | [870/875] | <b>[38/37]</b> | [1/1]   | [66/88] | [0/1]        | [3/3]        | [0/0] |
| 2:D           |             |           |           |                |         |         |              |              |       |
| rs7714386-    | 3573        | 113       | 160       | <b>20</b>      | 2       | 2       | 0            | 1            | 0     |
| rs60709797    | [3555/3538] | [174/200] | [132/118] | <b>[6/10]</b>  | [2/4]   | [1/0]   | [0/1]        | [0/0]        | [0/0] |
| rs7714386-    | 3572        | 175       | 113       | <b>20</b>      | 2       | 2       | 0            | 1            | 0     |
| rs58413939    | [3554/3543] | [188/209] | [132/119] | <b>[7/9]</b>   | [2/4]   | [1/0]   | [0/1]        | [0/0]        | [0/0] |
| rs297122-     | 3439        | 126       | 275       | <b>25</b>      | 3       | 3       | 0            | <b>5</b>     | 0     |
| rs4128728     | [3418/3399] | [145/163] | [293/293] | <b>[12/15]</b> | [2/1]   | [6/4]   | [0/0]        | <b>[0/1]</b> | [0/0] |
