# Supplementary material for: Reverse Pathway Genetic Approach Identifies Epistasis in Autism Spectrum Disorders
Source: PubMed Central journal article supplement (PMC5226683; doi:10.1371/journal.pgen.1006516), 2017-01-11
Supplement: pgen.1006516.s004.pdf [file pgen.1006516.s004.pdf]

**Table S4. Main effects for epistatic SNPs**

| SNP              | CHR | position  | gene   | MAF  | OR   | P    |
|------------------|-----|-----------|--------|------|------|------|
| chr15:38591893:D | 15  | 38591893  | SPRED1 | 0.03 | 1.05 | 0.59 |
| chr2:39208512:I  | 2   | 39208512  | SOS1   | 0.07 | 1.03 | 0.59 |
| chr7:140625707:I | 7   | 140625707 | BRAF   | 0.06 | 0.98 | 0.73 |
| rs114670618      | 3   | 141261220 | RASA2  | 0.03 | 0.90 | 0.29 |
| rs116702532      | 15  | 66676315  | MAP2K1 | 0.02 | 0.87 | 0.21 |
| rs117147554      | 15  | 66729976  | MAP2K1 | 0.02 | 1.02 | 0.83 |
| rs117672593      | 15  | 66720112  | MAP2K1 | 0.03 | 1.00 | 0.96 |
| rs117834974      | 11  | 119155649 | CBL    | 0.02 | 1.03 | 0.79 |
| rs11818771       | 10  | 112727826 | SHOC2  | 0.05 | 0.98 | 0.82 |
| rs11913063       | 22  | 22211605  | MAPK1  | 0.05 | 1.00 | 1.00 |
| rs12309312       | 12  | 112879955 | PTPN11 | 0.01 | 0.82 | 0.14 |
| rs13083303       | 3   | 12638696  | RAF1   | 0.14 | 0.95 | 0.24 |
| rs1357384        | 15  | 38596084  | SPRED1 | 0.02 | 1.01 | 0.91 |
| rs1733826        | 7   | 140495573 | BRAF   | 0.05 | 0.91 | 0.21 |
| rs17879775       | 17  | 29686758  | NF1    | 0.01 | 1.23 | 0.17 |
| rs2123876        | 2   | 39255873  | SOS1   | 0.07 | 1.01 | 0.93 |
| rs297122         | 2   | 39309141  | SOS1   | 0.04 | 0.96 | 0.64 |
| rs3093853        | 5   | 86690555  | RASA1  | 0.03 | 0.86 | 0.12 |
| rs41280637       | 2   | 39234432  | SOS1   | 0.02 | 1.12 | 0.28 |
| rs58347743       | 3   | 12622058  | RAF1   | 0.12 | 1.05 | 0.33 |
| rs61761074       | 12  | 25397593  | KRAS   | 0.03 | 1.02 | 0.88 |
| rs62487902       | 7   | 140438422 | BRAF   | 0.08 | 0.93 | 0.22 |
| rs6948377        | 7   | 140584262 | BRAF   | 0.05 | 1.07 | 0.38 |
| rs7133635        | 12  | 25388290  | KRAS   | 0.02 | 1.15 | 0.25 |
| rs72417307       | 22  | 22210145  | MAPK1  | 0.04 | 0.87 | 0.08 |
| rs73398437       | 15  | 38600123  | SPRED1 | 0.03 | 0.89 | 0.24 |
| rs74644204       | 12  | 112862991 | PTPN11 | 0.03 | 0.97 | 0.79 |
| rs75087565       | 10  | 112692665 | SHOC2  | 0.03 | 0.95 | 0.61 |
| rs75217189       | 15  | 66788118  | MAP2K1 | 0.02 | 1.12 | 0.29 |
| rs75756950       | 22  | 22126824  | MAPK1  | 0.06 | 0.95 | 0.51 |
| rs75961317       | 22  | 22215130  | MAPK1  | 0.03 | 1.13 | 0.16 |
| rs7714386        | 5   | 86634506  | RASA1  | 0.02 | 1.11 | 0.40 |

|                    |           |                 |                      |             |             |             |
|--------------------|-----------|-----------------|----------------------|-------------|-------------|-------------|
| rs9672789          | 15        | 66713633        | MAP2K1               | 0.08        | 0.92        | 0.18        |
| rs12239450         | 1         | 47933492        | FOXD2 / TRABD2B      | 0.09        | 1.07        | 0.33        |
| rs57173428         | 1         | 55100883        | ACOT11 / TTC4        | 0.02        | 0.90        | 0.43        |
| rs17110869         | 1         | 55108237        | MROH7                | 0.02        | 0.88        | 0.32        |
| rs72690923         | 1         | 106012196       | AMY1B / PRMT6        | 0.03        | 1.01        | 0.93        |
| rs28459694         | 1         | 158355190       | CD1E / OR10T2        | 0.03        | 0.90        | 0.43        |
| rs62168052         | 2         | 135088091       | MGAT5                | 0.02        | 0.98        | 0.88        |
| rs1318299          | 2         | 220283259       | DES                  | 0.02        | 1.08        | 0.61        |
| rs149565205        | 3         | 6539899         | EDEM1 / GRM7         | 0.03        | 1.27        | 0.10        |
| rs11925140         | 3         | 112842425       | GTPBP8 / BOC         | 0.02        | 0.89        | 0.32        |
| rs56667163         | 3         | 136773620       | IL20RB / SOX14       | 0.06        | 1.02        | 0.74        |
| rs304654           | 4         | 124123184       | SPATA5               | 0.02        | 1.07        | 0.62        |
| rs73760016         | 5         | 19469048        | BASP1 / CDH18        | 0.03        | 0.98        | 0.86        |
| rs80214471         | 5         | 66139877        | MAST4                | 0.03        | 0.89        | 0.29        |
| rs254700           | 5         | 134103554       | DDX46                | 0.02        | 1.19        | 0.24        |
| rs143823697        | 5         | 134412896       | PITX1 / H2AFY        | 0.03        | 1.00        | 0.96        |
| chr6:80625529:D    | 6         | 80625529        | ELOVL4               | 0.13        | 0.98        | 0.67        |
| rs114617777        | 6         | 88085754        | SMIM8 / CFAP206      | 0.06        | 1.00        | 0.94        |
| rs113552799        | 6         | 123947624       | TRDN                 | 0.04        | 1.06        | 0.47        |
| rs80179511         | 6         | 154274998       | RGS17 / OPRM1        | 0.06        | 0.99        | 0.90        |
| rs118078508        | 6         | 154999201       | CNKSR3 / SCAF8       | 0.02        | 1.00        | 1.00        |
| rs73688732         | 7         | 31068898        | GHRHR / ADCYAP1R1    | 0.02        | 1.05        | 0.65        |
| rs114490548        | 7         | 38139570        | EPDR1 / STARD3NL     | 0.02        | 0.95        | 0.64        |
| rs2043732          | 7         | 51192161        | COBL                 | 0.06        | 1.12        | 0.15        |
| rs1826547          | 8         | 27414024        | EPHX2 / SCARA3       | 0.03        | 0.90        | 0.35        |
| <b>rs192196641</b> | <b>10</b> | <b>8587332</b>  | <b>GATA3 / CELF2</b> | <b>0.04</b> | <b>0.85</b> | <b>0.04</b> |
| <b>rs11255742</b>  | <b>10</b> | <b>8598746</b>  | <b>KRT8P16</b>       | <b>0.03</b> | <b>0.85</b> | <b>0.05</b> |
| rs2765709          | 10        | 25507753        | GPR158               | 0.10        | 1.03        | 0.66        |
| rs140695911        | 10        | 29495250        | BAMBI / LYZL1        | 0.02        | 1.00        | 0.96        |
| rs41274082         | 10        | 65381281        | REEP3                | 0.02        | 1.05        | 0.62        |
| rs2441690          | 11        | 127107790       | KIRREL3 / ETS1       | 0.05        | 1.01        | 0.87        |
| rs12582581         | 12        | 511258          | CCDC77               | 0.02        | 1.09        | 0.47        |
| chr12:21624694:D   | 12        | 21624694        | RECQL                | 0.10        | 1.02        | 0.79        |
| <b>rs73475884</b>  | <b>13</b> | <b>35080882</b> | <b>RFC3 / NBEA</b>   | <b>0.07</b> | <b>1.19</b> | <b>0.01</b> |
| <b>rs55942942</b>  | <b>13</b> | <b>35095658</b> | <b>RFC3</b>          | <b>0.07</b> | <b>1.19</b> | <b>0.01</b> |

|                  |    |          |                |      |      |      |
|------------------|----|----------|----------------|------|------|------|
| rs78762238       | 13 | 64302181 | PCDH20/ PCDH9  | 0.03 | 1.10 | 0.41 |
| chr13:78700408:D | 13 | 78700408 | EDNRB / POU4F1 | 0.02 | 0.97 | 0.84 |
| rs58413939       | 15 | 23003403 | CYFIP1         | 0.04 | 0.87 | 0.17 |
| rs60709797       | 15 | 23004989 | NIPA2          | 0.03 | 0.84 | 0.08 |
| chr15:71697182:D | 15 | 71697182 | THSD4          | 0.02 | 1.16 | 0.20 |
| rs4128728        | 18 | 49575401 | MEX3C / DCC    | 0.03 | 0.89 | 0.30 |

---

Abbreviations: CHR chromosome; MAF minor allele frequency; OR odd ratio; P p-value; SNPs with P-value < 0.05 are in bold
