# Supplementary material for: Reverse Pathway Genetic Approach Identifies Epistasis in Autism Spectrum Disorders
Source: PubMed Central journal article supplement (PMC5226683; doi:10.1371/journal.pgen.1006516), 2017-01-11
Supplement: pgen.1006516.s007.pdf [file pgen.1006516.s007.pdf]

**Table S7. Association signal at varying FDR thresholds.** Percentage and number of Ras/MAPK polymorphisms meeting varying FDR thresholds for ASD association.

|                    | <b>FDR<br/>0.1</b> | <b>FDR<br/>0.2</b> | <b>FDR<br/>0.3</b> | <b>FDR<br/>0.5</b> | <b>FDR<br/>0.7</b> | <b>FDR<br/>0.9</b> |
|--------------------|--------------------|--------------------|--------------------|--------------------|--------------------|--------------------|
| <b>N SNPs</b>      | 0                  | 228                | 263                | 323                | 1,179              | 1,736              |
| <b>% above FDR</b> | 0                  | 9                  | 10                 | 13                 | 47                 | 69                 |

Abbreviations: % above FDR: percentage of SNPs above FDR threshold; FDR: False Discovery Rate
