# Supplementary material for: Reverse Pathway Genetic Approach Identifies Epistasis in Autism Spectrum Disorders
Source: PubMed Central journal article supplement (PMC5226683; doi:10.1371/journal.pgen.1006516), 2017-01-11
Supplement: pgen.1006516.s008.pdf [file pgen.1006516.s008.pdf]

**Table S8. Table of Taqman probes.** The catalog number by Taqman for each probe used by gene is listed in the table.

| Gene name       | Catalog (Taqman probes) |
|-----------------|-------------------------|
| <i>ELMO1</i>    | Hs00404979_m1           |
| <i>EPDR1</i>    | Hs01556067_m1           |
| <i>GPR141</i>   | Hs00704255_s1           |
| <i>GUSB</i>     | Hs00939627_m1           |
| <i>NME8</i>     | Hs00213301_m1           |
| <i>SFRP4</i>    | Hs00180066_m1           |
| <i>STARD3NL</i> | Hs01106499_m1           |
