# Supplementary material for: Reverse Pathway Genetic Approach Identifies Epistasis in Autism Spectrum Disorders
Source: PubMed Central journal article supplement (PMC5226683; doi:10.1371/journal.pgen.1006516), 2017-01-11

**Figure S4. Correlation plot of top Ras/MAPK - ASD epistasis results.** The plot shows the  $-\log_{10} P$ -values from the trio correlation test (y-axis) analysis and PLINK(63, 64) epistasis test (x-axis) in ASD cases for the most significant PLINK(63, 64) epistasis test results ( $P < 1.0 \times 10^{-6}$ ). The gray line graphs  $y=x$ .

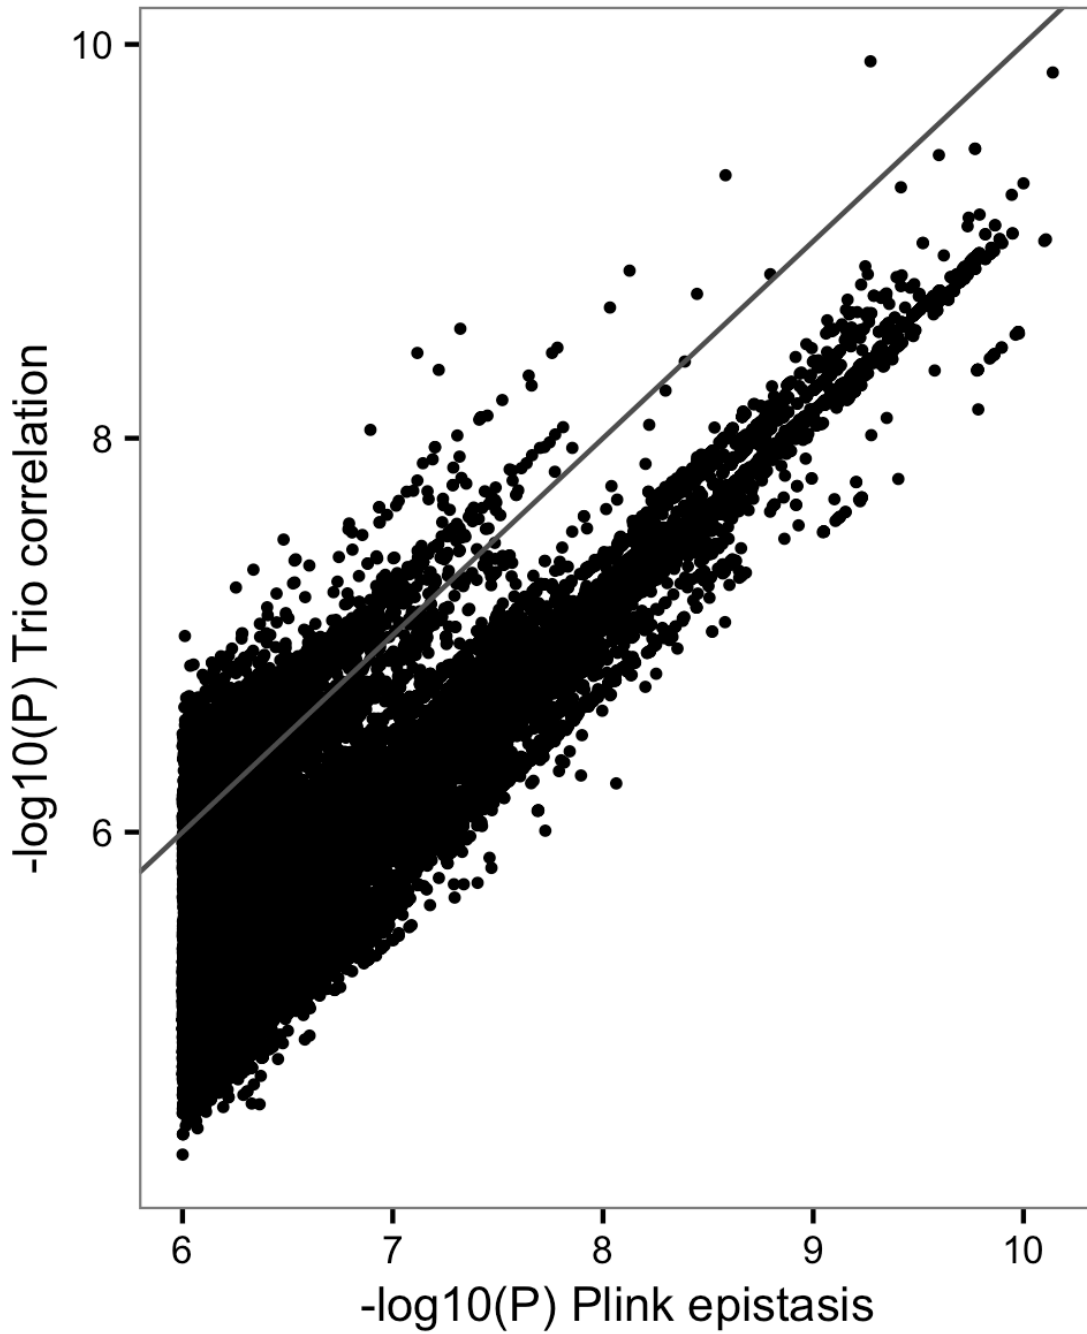

Supplement: pgen.1006516.s012.pdf [file pgen.1006516.s012.pdf]
