# Supplementary material for: Reverse Pathway Genetic Approach Identifies Epistasis in Autism Spectrum Disorders
Source: PubMed Central journal article supplement (PMC5226683; doi:10.1371/journal.pgen.1006516), 2017-01-11

**Figure S6. Distribution of social responsiveness scores for top six candidate modifiers.**

The asterisks on the RASopathies normalized social responsiveness score (SRS) distribution show the normalized SRS for heterozygous individuals for the top SNPs ( $MAF \leq 0.05$ ) rs62621010 **(A)**, rs117802216 **(B)** and rs149068014 **(C)**. No homozygous individuals for the minor allele are found. Each individual is labeled by RASopathy. For the common SNPs ( $MAF > 0.05$ ) rs531418 **(D)**, rs11013152 **(E)** and rs1028948 **(F)**, the normalized social responsiveness score are shown by genotype in the boxplots. When heterogeneity is significant (see Table 2), only individuals in RASopathy groups that contribute to the meta-analysis evidence are shown.

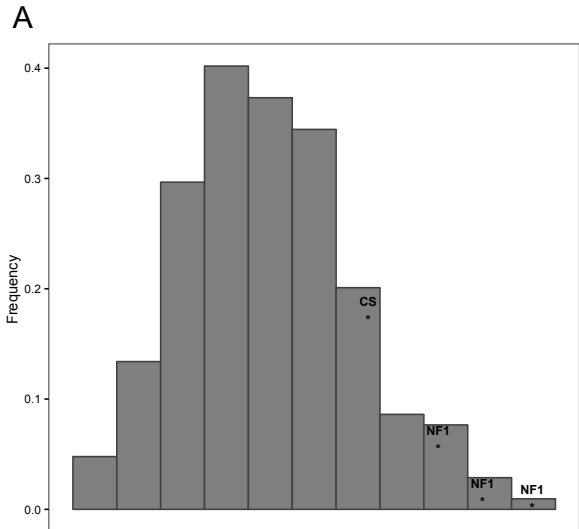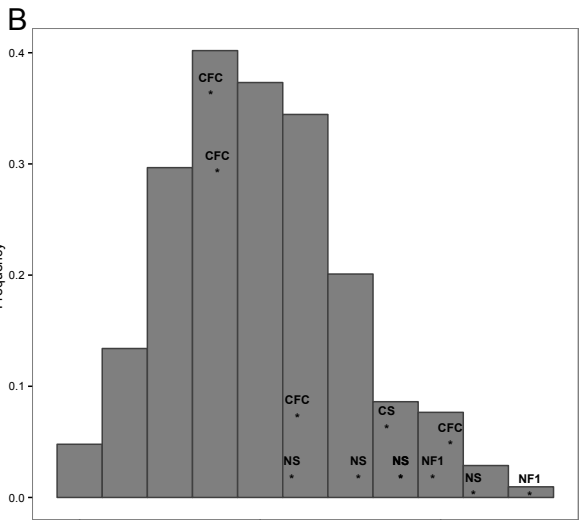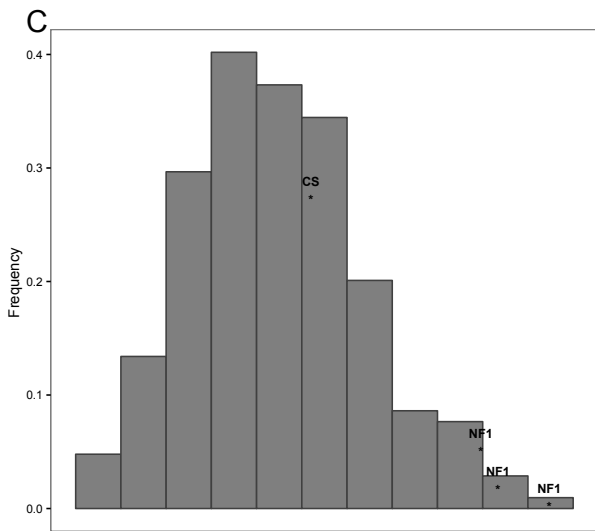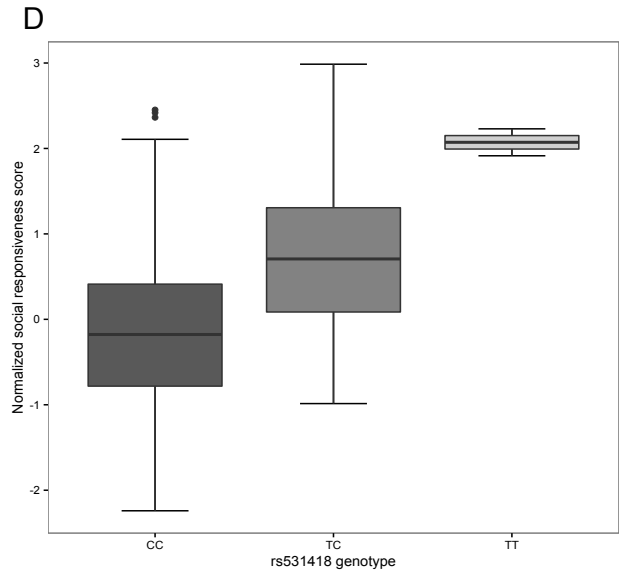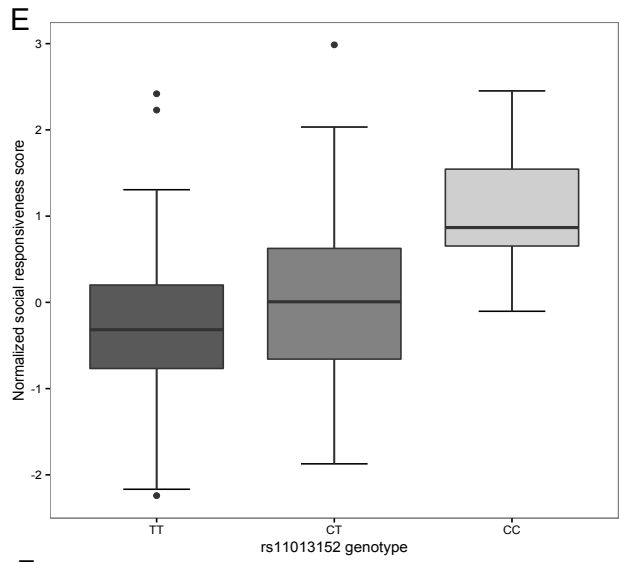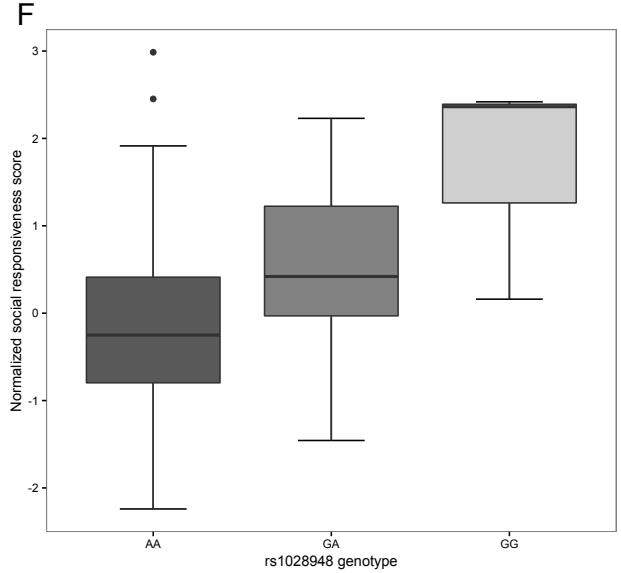

Supplement: pgen.1006516.s014.pdf [file pgen.1006516.s014.pdf]
