# Supplementary material for: Reverse Pathway Genetic Approach Identifies Epistasis in Autism Spectrum Disorders
Source: PubMed Central journal article supplement (PMC5226683; doi:10.1371/journal.pgen.1006516), 2017-01-11

**Figure S7: Neural cell lines.** CFC and control neural cultures derived from iPSC.(A) Electropherogram showing the heterozygote point mutation found in CFC patient iPSC lines (right) and the wild-type genotype from Control lines (left). (B) Neural culture differentiation from iPSC protocol outline based on Zhang *et al* (132). (C) Immunostaining of TUJ1, GFAP, MAP2, FOXP2, and CUX1 of CFC lines and control lines at the same time point (day 60) the qRT-PCR experiments were performed.

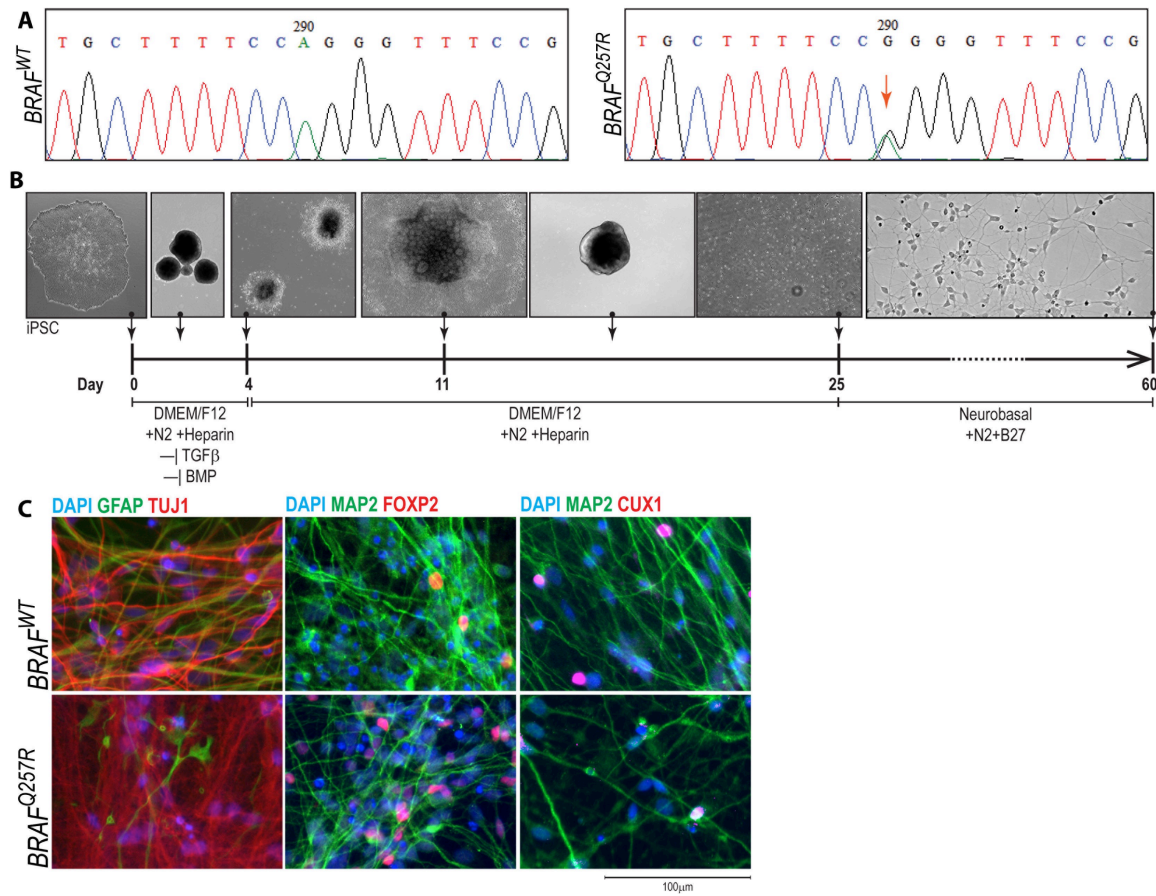

Supplement: pgen.1006516.s015.pdf [file pgen.1006516.s015.pdf]
