# Supplementary material for: Reverse Pathway Genetic Approach Identifies Epistasis in Autism Spectrum Disorders
Source: PubMed Central journal article supplement (PMC5226683; doi:10.1371/journal.pgen.1006516), 2017-01-11

**Figure S9. QQ-plot for ASD association.** The quantile-quantile plot is shown displaying observed vs. expected ASD association results for the TDT analysis of our trio dataset. Each point represents  $-\log(P)$  for a SNP. The X-axis shows expected  $-\log(P)$  and Y-axis shows observed  $-\log(P)$ , with the red line representing the null expectation with a grey shaded 95% confidence interval. Different FDR thresholds are shown with dashed lines.

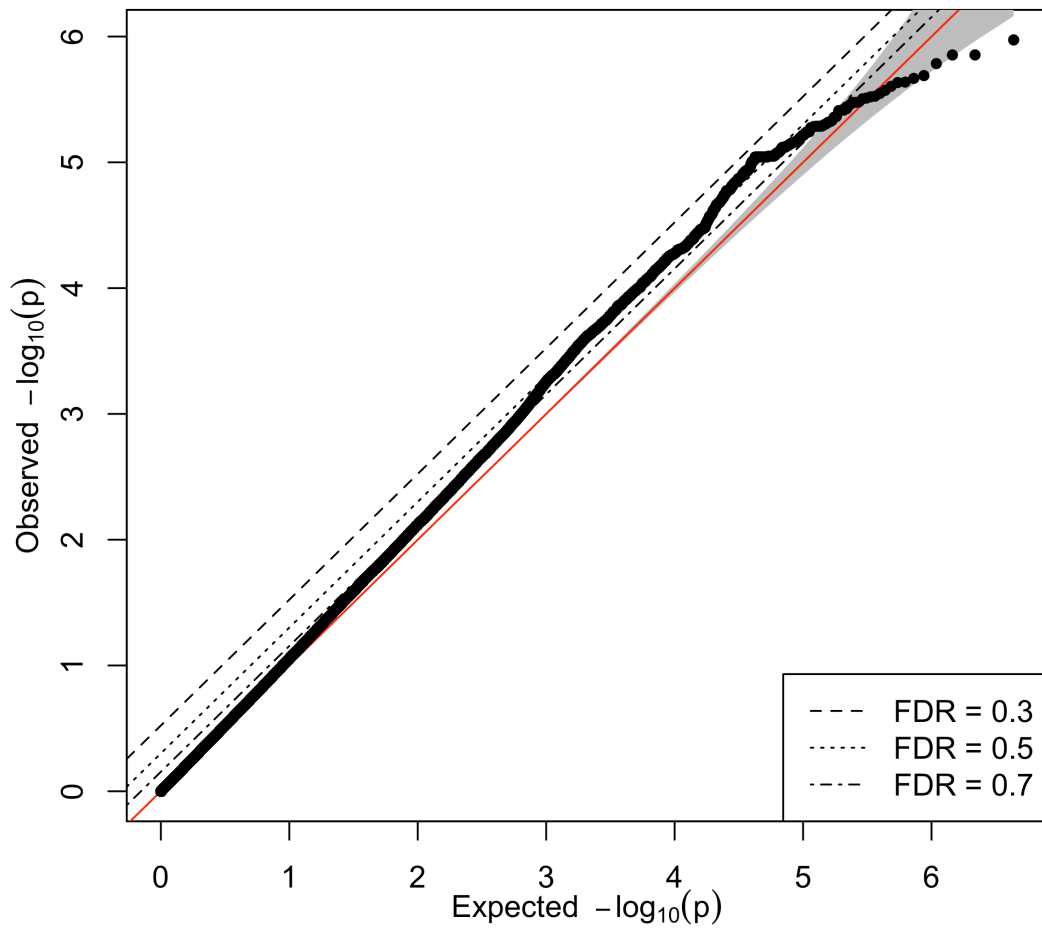

Supplement: pgen.1006516.s017.pdf [file pgen.1006516.s017.pdf]
